# Supplementary material
Source: PubMed Central journal article supplement (PMC7484129)
Supplement: NIHMS1614765-supplement-SI_file.pdf [file NIHMS1614765-supplement-SI_file.pdf]

Supplementary information for  
Dextran Coated Cerium Oxide Nanoparticles: A Computed Tomography  
Contrast Agent for Imaging the Gastrointestinal Tract and Inflammatory  
Bowel Disease

Pratap C. Naha,<sup>1\*</sup> Jessica C. Hsu,<sup>1,2</sup> Johoon Kim,<sup>1,2</sup> Shrey Shah,<sup>1,2</sup> Mathilde Bouché,<sup>1</sup> Salim Si-Mohamed,<sup>3,4</sup>  
Derick N. Rosario-Berrios,<sup>5</sup> Philippe Douek,<sup>3,4</sup> Maryam Hajfathalian,<sup>1</sup> Parisa Yasini,<sup>6</sup> Sanjay Singh,<sup>7</sup> Mark  
A. Rosen,<sup>1</sup> Matthew A. Morgan,<sup>1</sup> David P. Cormode<sup>1,2,8\*</sup>

<sup>1</sup>Department of Radiology, University of Pennsylvania, Philadelphia, Pennsylvania, USA

<sup>2</sup>Bioengineering, University of Pennsylvania, Philadelphia, Pennsylvania, USA

<sup>3</sup>Department of Radiology, Hôpital Cardio-Vasculaire et Pneumologique Louis Pradel, Lyon, France

<sup>4</sup>Centre de Recherche en Acquisition et Traitement de l'Image pour la Santé (CREATIS), UMR CNRS  
5220, Inserm U1044, University Lyon1 Claude Bernard, Lyon, France

<sup>5</sup>Biochemistry and Molecular Biophysics, University of Pennsylvania, Philadelphia, Pennsylvania, USA

<sup>6</sup>Department of Chemistry, Temple University, Philadelphia, Pennsylvania, USA

<sup>7</sup>Division of Biological and Life Sciences School of Arts and Sciences Ahmedabad University, Ahmedabad,  
Gujarat, India

<sup>8</sup>Medicine, Division of Cardiovascular Medicine, University of Pennsylvania, Pennsylvania, USA

\* Corresponding authors: University of Pennsylvania, 3400 Spruce St, 1 Silverstein, Philadelphia, PA  
19104, USA, [pratap.naha@penncmedicine.upenn.edu](mailto:pratap.naha@penncmedicine.upenn.edu) and [david.cormode@penncmedicine.upenn.edu](mailto:david.cormode@penncmedicine.upenn.edu)

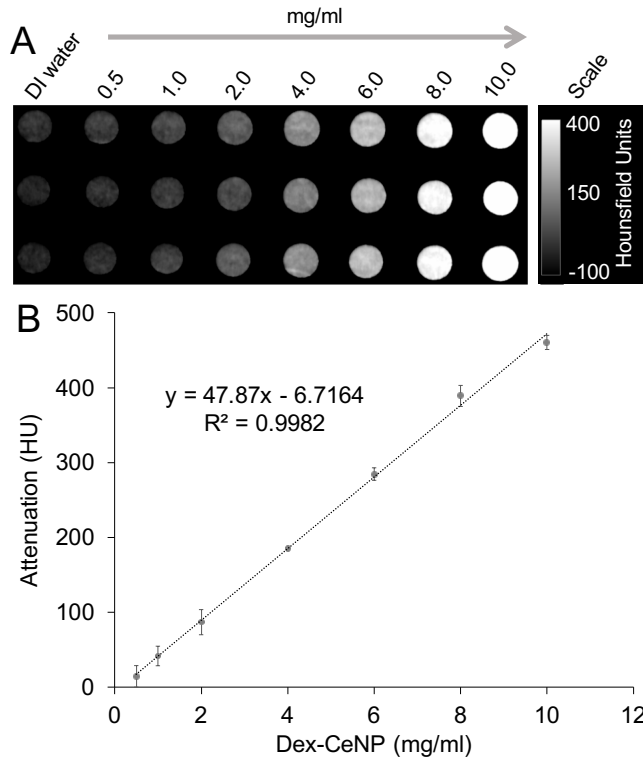

Figure S1. A) MicroCT image (Molecubes) of a phantom composed of varying concentrations of Dex-CeNP. B) Analysis of the attenuation generated from different Dex-CeNP concentrations from microCT images.

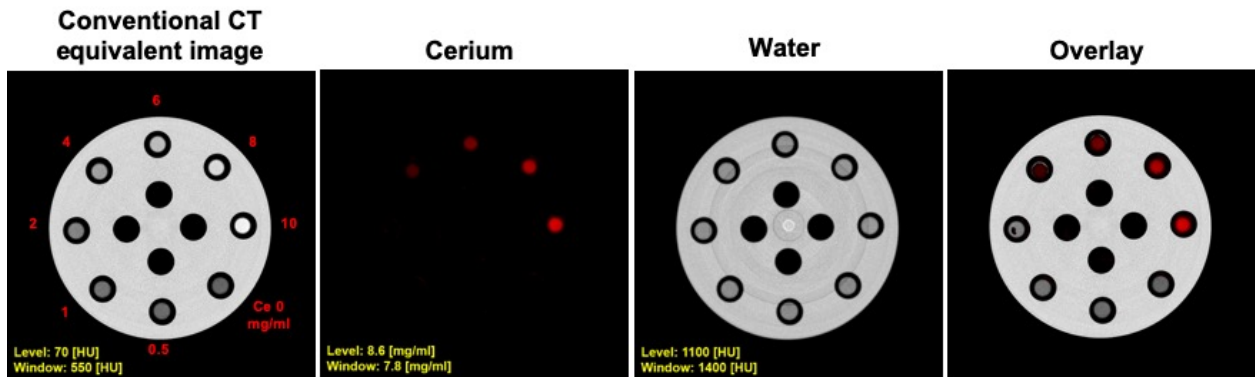

Figure S2. Spectral photon counting CT images of Dex-CeNP.

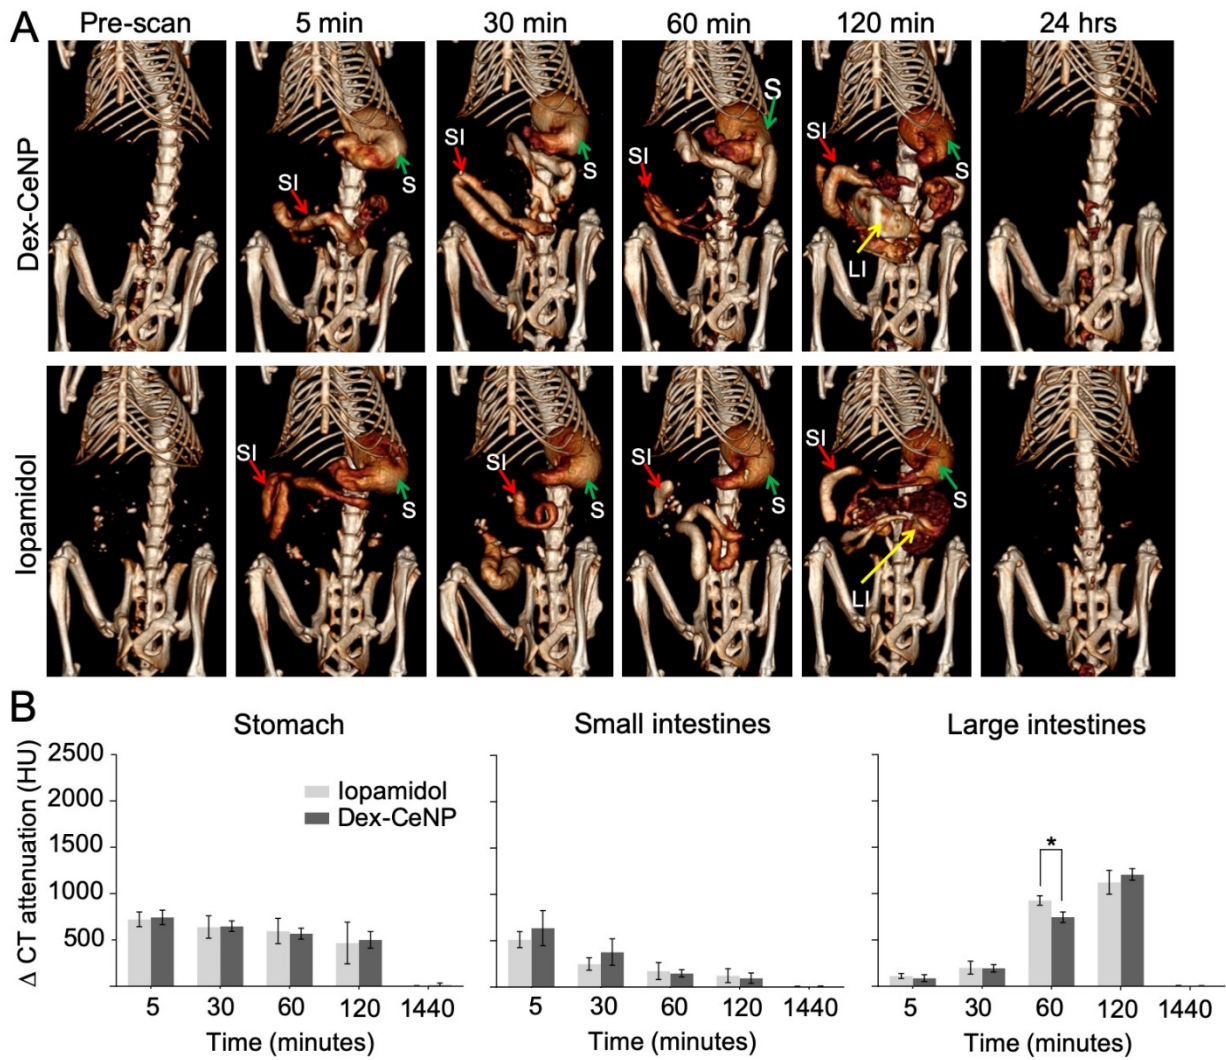

Figure S3. *In vivo* CT imaging of healthy mice that had been administered Dex-CeNP or iopamidol orally. A) Representative micro-CT images of healthy mice, pre and post oral administration of Dex-CeNP or iopamidol. ‘S’ indicates stomach; ‘SI’ indicates the small intestine; and ‘LI’ indicates the large intestine (images displayed with a window width of 240 HU and a window level of 380 HU). B) Quantitative analysis of the CT images acquired from healthy mice administered Dex-CeNP or iopamidol at different time points. A significant difference in CT contrast was observed in the large intestine of mice receiving Dex-CeNP and

iopamidol, at the 60 minutes time point. \* indicates statistically significant differences at  $p < 0.05$ . Error bars are standard deviation.

|                         | <b>p-value</b> |         |         |          |           |
|-------------------------|----------------|---------|---------|----------|-----------|
|                         | 5 mins         | 30 mins | 60 mins | 120 mins | 1440 mins |
| <i>Small intestines</i> |                |         |         |          |           |
| Iopamidol               | 0.064          | 0.425   | 0.683   | 0.037    | 0.988     |
| Dex-CeNP                | 0.955          | 0.678   | 0.076   | 0.269    | 0.054     |
| <i>Large intestines</i> |                |         |         |          |           |
| Iopamidol               | 0.005          | 0.024   | 0.001   | 0.085    | 0.487     |
| Dex-CeNP                | 0.531          | 0.930   | 0.043   | 0.010    | 0.001     |
| <i>Stomach</i>          |                |         |         |          |           |
| Iopamidol               | 0.468          | 0.593   | 0.197   | 0.503    | 0.541     |
| Dex-CeNP                | 0.336          | 0.050   | 0.047   | 0.020    | 0.118     |

Supporting Table 1. P-values of healthy vs. DSS-colitis mice for each agent and in each organ for CT attenuation changes over the 24 hours imaging time points.

|                         | <b>p-value</b> |         |         |          |           |
|-------------------------|----------------|---------|---------|----------|-----------|
|                         | 5 mins         | 30 mins | 60 mins | 120 mins | 1440 mins |
| <i>Small intestines</i> |                |         |         |          |           |
| Healthy                 | 0.189          | 0.084   | 0.551   | 0.491    | 0.648     |
| Colitis                 | 0.001          | 0.202   | 0.519   | 0.001    | 0.063     |
| <i>Large intestines</i> |                |         |         |          |           |
| Healthy                 | 0.264          | 0.827   | 0.001   | 0.189    | 0.955     |
| Colitis                 | 0.626          | 0.345   | 0.004   | 0.015    | 0.001     |
| <i>Stomach</i>          |                |         |         |          |           |
| Healthy                 | 0.652          | 0.877   | 0.656   | 0.746    | 0.187     |
| Colitis                 | 0.687          | 0.179   | 0.358   | 0.242    | 0.215     |

Supporting Table 2. P-values of iopamidol vs. Dex-CeNP for each mouse status and in each organ for CT attenuation changes over the 24 hours imaging time points.

|                         | <b>p-value</b> |         |         |          |           |
|-------------------------|----------------|---------|---------|----------|-----------|
|                         | 5 mins         | 30 mins | 60 mins | 120 mins | 1440 mins |
| <i>Small intestines</i> |                |         |         |          |           |
| Mice                    | 0.333          | 0.926   | 0.129   | 0.209    | 0.055     |
| Agents                  | 0.002          | 0.025   | 0.934   | 0.158    | 0.158     |
| Mice#Agents             | 0.287          | 0.424   | 0.374   | 0.012    | 0.053     |
| <i>Large intestines</i> |                |         |         |          |           |
| Mice                    | 0.030          | 0.389   | 0.225   | 0.001    | 0.001     |
| Agents                  | 0.691          | 0.382   | 0.032   | 0.002    | 0.001     |
| Mice#Agents             | 0.255          | 0.305   | 0.001   | 0.021    | 0.001     |
| <i>Stomach</i>          |                |         |         |          |           |
| Mice                    | 0.219          | 0.069   | 0.021   | 0.047    | 0.177     |
| Agents                  | 0.551          | 0.419   | 0.357   | 0.738    | 0.569     |
| Mice#Agents             | 0.837          | 0.297   | 0.857   | 0.367    | 0.074     |

Supporting Table 3. Two-way ANOVA test to analyze the interaction between mouse status (healthy vs. DSS-colitis) and agent types (iopamidol vs. Dex-CeNP) and the effect of both factors on CT attenuation changes over the 24 hours imaging time points in each organ.

| <b>p-value</b>   |                  |                  |         |
|------------------|------------------|------------------|---------|
|                  | Small intestines | Large intestines | Stomach |
| Mice             | 0.719            | 0.027            | 0.001   |
| Agents           | 0.001            | 0.001            | 0.365   |
| Time             | 0.001            | 0.001            | 0.001   |
| Mice#Agents#Time | 0.260            | 0.001            | 0.869   |

Supporting Table 4. Three-way ANOVA test to analyze the interactions among mouse status (healthy vs. DDS-colitis), agent types (iopamidol vs. Dex-CeNP) and time points (5 to 1440 minutes) and the effect of all three factors on CT attenuation changes in each organ.



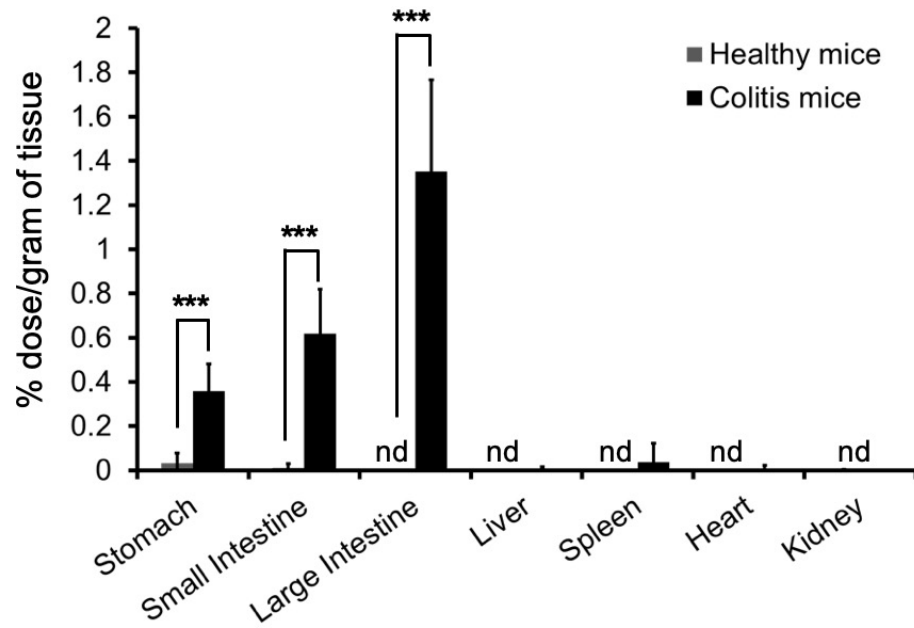

Figure S4. Biodistribution of Dex-CeNP in healthy and DSS-colitis mice at 24 hrs post administration. \*\*\* indicates statistically significant differences in at  $p < 0.001$ . 'nd' stands for not detected. Error bars are standard deviations.
